# Supplementary material for: 2-Arachidonoylglycerol Reduces the Production of Interferon-Gamma in T Lymphocytes from Patients with Systemic Lupus Erythematosus
Source: MDPI journal article supplement (doi:10.3390/biomedicines10071675), 2022-07-12
Supplement: s1 [file s1]

Supplementary Materials

**Supplementary Table S1.** antibodies used for flow cytometry analysis. IL: interleukin; IFN: interferon.

| Antibody           | Dilution |
|--------------------|----------|
| CD4 PercP Vio 700  | 1:100    |
| CD8 APC Vio 770    | 1:100    |
| CD3 PE Vio 770     | 1:100    |
| IL-4 PE            | 1:50     |
| IFN- $\gamma$ FITC | 1:50     |
| FoxP3 PE           | 1:50     |
| IL-17A APC         | 1:50     |
| CD4 APC            | 1:100    |

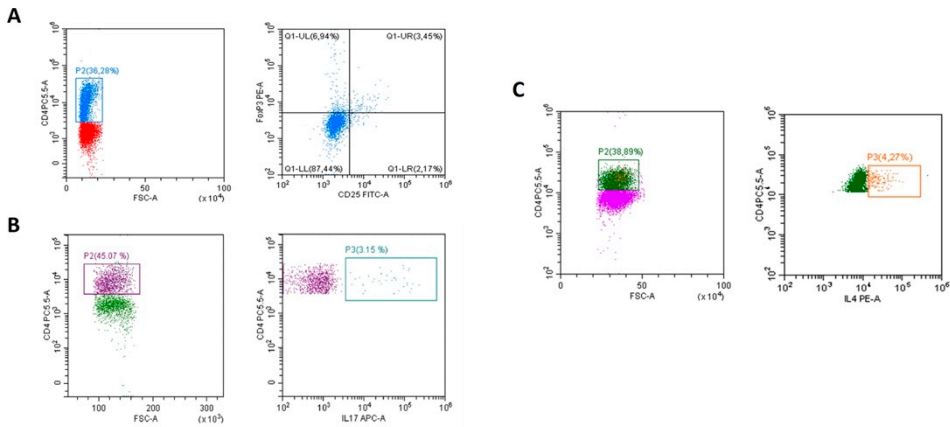

**Supplementary Figure S1.** Representative dot plots of peripheral blood lymphocytes from one SLE patient showing the gating strategy to identify Treg cells (A), Th17 cells (B) and CD4+ T lymphocytes expressing IL-4 (C), all within the P2 population.

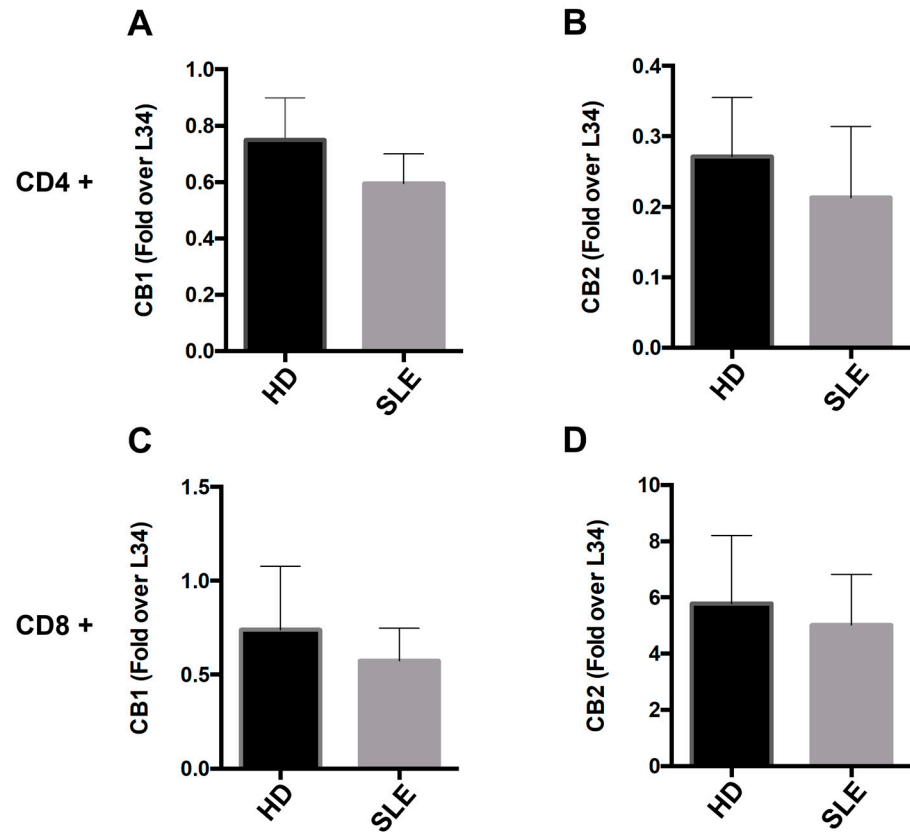

**Supplementary Figure S2.** Gene expression of CB<sub>1</sub> and CB<sub>2</sub> in CD4<sup>+</sup> (A,B) and CD8<sup>+</sup> (C,D) cells of SLE patients compared to healthy donors. Values are reported as fold change in gene expression over ribosomal protein L34. Data are shown as means  $\pm$  SEM, n = 5 samples per group. No significant difference using the Mann-Whitney test.

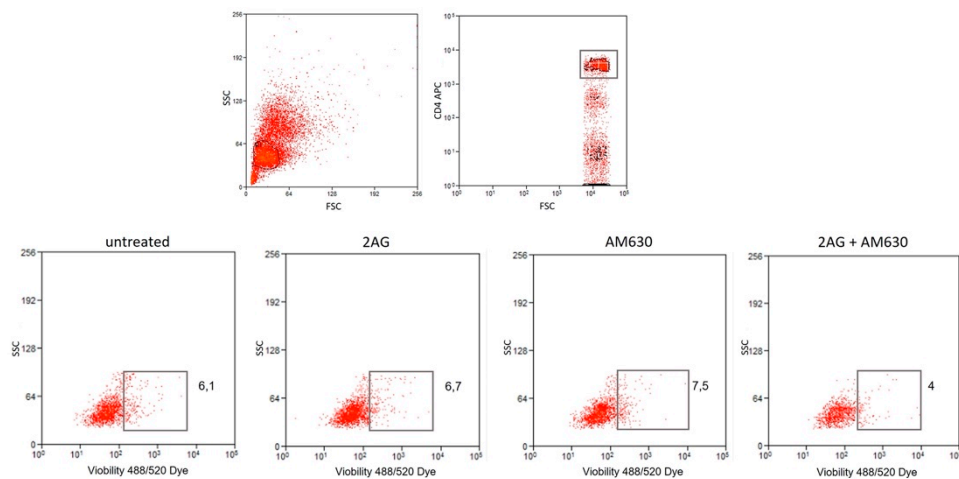

**Supplementary Figure S3.** Effect of 2-AG and CB<sub>2</sub> inhibitor AM630 on cell vitality. Representative flow cytometry dot plots showing the percentage of dead CD4<sup>+</sup> T lymphocytes from SLE patients (n = 5) after treatment with 2-AG alone and in combination with AM630.
